# Supplementary material
Source: PubMed Central journal article supplement (PMC7966255)
Supplement: 3979_table.pdf [file 3979_table.pdf]

**On-line Table: Demographics, history, and imaging studies of patients with ossification and prior fibular free flap reconstruction**

| Pt | Age at FFF | Sex | Site     | Indication    | Radiation    | Ossification Features     | Maximum Dimensions                                   | Time from          |                    | Time from FFF to MRI (mo) |
|----|------------|-----|----------|---------------|--------------|---------------------------|------------------------------------------------------|--------------------|--------------------|---------------------------|
|    |            |     |          |               |              |                           |                                                      | FFF to CT (mo)     | FFF to PET/CT (mo) |                           |
| 1  | 60         | M   | Mandible | Rec HNSCC     | Prior to FFF | Bonelike, linear          | 4 cm, 2-mm thick                                     | 4                  | NA                 | 5                         |
| 2  | 37         | M   | Maxilla  | Sarcoma       | None         | Bonelike, linear          | 4.3 cm, 3-mm thick                                   | 9                  | NA                 | NA                        |
| 3  | 59         | M   | Mandible | Osteomyelitis | None         | Bonelike, linear          | 6 cm, $\leq$ 3-mm thick                              | 1, 2, 5, 9, 12     | NA                 | NA                        |
| 4  | 77         | M   | Maxilla  | Failed flap   | None         | Dense, multisegmented     | Total 4.3 cm, 1- to 2-mm thick                       | 5                  | NA                 | NA                        |
| 5  | 61         | M   | Mandible | Metastasis    | None         | Dense, linear             | 2.8 cm, 2-mm thick                                   | NA                 | 11                 | NA                        |
| 6  | 51         | M   | Mandible | Rec HNSCC     | Prior to FFF | Bonelike, curved          | 2.6 cm, 6-mm thick                                   | 10, 12, 14, 19, 20 | 7                  | 3, 6, 13                  |
| 7  | 47         | M   | Mandible | HNSCC         | Prior to FFF | Bonelike, curved          | 5 cm, 4-mm thick                                     | 11                 | 1, 10, 12, 14, 17  | 5                         |
| 8  | 64         | M   | Mandible | HNSCC         | After FFF    | Dense, linear             | 3.4 cm, 3-mm thick                                   | NA                 | 6                  | 7                         |
| 9  | 72         | M   | Mandible | HNSCC         | After FFF    | Bonelike and linear dense | 2.7 cm $\times$ 1 mm plus triangular 7 $\times$ 4 mm | 5, 13, 17          | NA                 | 7                         |
| 10 | 53         | M   | Mandible | HNSCC         | After FFF    | Dense, linear             | 1 cm, 2-mm thick                                     | NA                 | 3                  | NA                        |
| 11 | 78         | F   | Mandible | Metastasis    | After FFF    | Multisegmented            | 2 cm, 1.5 cm, 1.2 cm $\times$ 2 mm thickness         | NA                 | 8                  | NA                        |
| 12 | 59         | M   | Mandible | Rec HNSCC     | Prior to FFF | Dense, linear             | 4.7 cm, 6-mm thick                                   | 3                  | NA                 | 4                         |
| 13 | 63         | M   | Mandible | ORN           | Prior to FFF | Bonelike, linear          | 4 cm, 3-mm thick                                     | 3, 7               | NA                 | NA                        |
| 14 | 71         | M   | Mandible | ORN           | Prior to FFF | Linear dense to bone      | 1.8 cm, 0.5-mm thick                                 | 1, 15              | NA                 | NA                        |
| 15 | 76         | F   | Mandible | HNSCC         | After FFF    | Bonelike, rectangular     | 6 $\times$ 3 mm                                      | NA                 | 9                  | 7, 13                     |
| 16 | 69         | M   | Mandible | Failed flap   | None         | Dense, linear             | Total 3.6 cm, 1.4 mm                                 | 1                  | NA                 | 2                         |

**Note:**—Pt indicates patient; Rec, recurrent; ORN, osteoradionecrosis; NA, not applicable; scan obtained.
